# Supplementary material
Source: publisher figshare collection journal article supplement (https://geolsoc.figshare.com/ndownloader/files/30841424)
Supplement: Supplementary file 1 [file 30841424]

## Sheet: Sheet1
TableS4: U-Pb data of the secondary standards of each analytical session.
Spot	U (ppm)	± 2σ	Th (ppm)	± 2σ	Th/U	238U/206Pb	± 2σ	207Pb/206Pb	± 2σ	206Pb/238U age (Ma)	± 2σ	207Pb/206Pb age (Ma)	± 2σ	Concordia age (Ma)	± 2σ
Session1
ogc - 1.d	657.808	15.2721	84.215	2.01362	0.128024	1.36769	0.0178529	0.297117	0.0075661	3537.7	35.6	3454.6	39.6	3499.6	25.8
ogc - 2.d	792.729	8.86962	104.153	1.14478	0.131385	1.39736	0.0180826	0.304669	0.00835252	3479.7	34.8	3493.4	42.4	3485.2	27
ogc - 3.d	1141.52	33.6896	170.545	4.98345	0.149402	1.37679	0.0187941	0.29312	0.00778828	3519.7	37	3433.5	41.2	3480.3	26.8
ogc - 4.d	1337.83	26.8415	210.188	4.41896	0.157111	1.44018	0.0186212	0.301594	0.00805668	3399.2	34.2	3477.7	41.4	3430	27
ogc - 5.d	1525.13	20.666	267.126	3.39862	0.17515	1.37189	0.0182186	0.30842	0.00825845	3529.4	36	3512.3	41.4	3522	27
ogc - 6.d	1313.59	25.0717	207.397	3.83908	0.157885	1.45762	0.0177503	0.300273	0.0079271	3367.5	32	3470.9	41	3404.8	26
ogc - 7.d	324.067	4.54195	40.0067	0.654224	0.123452	1.61121	0.0211966	0.295264	0.00802433	3112.5	32.4	3444.8	42.2	3214.6	29
ogc - 9.d	302.518	5.76604	35.2566	0.74218	0.116544	1.38983	0.0156029	0.294873	0.00732729	3494.2	30.2	3442.8	38.6	3474.2	23.4
ogc - 10.d	315.596	6.00896	36.5252	0.757657	0.115734	1.32932	0.0181557	0.302741	0.00825248	3615.9	37.8	3483.6	42.2	3554.6	27
ogc - 11.d	394.643	9.77454	51.6143	1.28972	0.130788	1.37913	0.0171814	0.300886	0.00842764	3515.1	33.8	3474.1	43.4	3499.4	26.2
ogc - 12.d	290.28	5.02724	33.9749	0.677685	0.117042	1.37858	0.0169846	0.298945	0.00791104	3516.2	33.4	3464	41	3495	25.4
ogc - 13.d	307.292	5.78796	35.7159	0.671004	0.116228	1.38191	0.0191973	0.306549	0.00840376	3509.7	37.6	3502.9	42.4	3506.7	28
ogc - 14.d	1753.16	35.0864	327.456	6.13018	0.186781	1.37436	0.0173673	0.298254	0.00759346	3524.5	34.4	3460.5	39.4	3496.3	25.4
ogc - 15.d	1670.57	30.3072	311.693	5.90128	0.186579	1.37342	0.0159297	0.297117	0.00734484	3526.4	31.6	3454.6	38.4	3496.6	23.8
ogc - 16.d	1679.09	30.7535	304.38	5.56587	0.181277	1.37015	0.0168525	0.305324	0.00829693	3532.8	33.4	3496.7	42	3518.6	25.8
ogc - 17.d	1216.01	34.0483	224.535	6.57789	0.184649	1.45074	0.0175589	0.31222	0.00901901	3380	31.8	3531.2	44.6	3426.8	27.2
ogc - 18.d	1102.17	21.251	221	4.1235	0.200513	1.38257	0.0186819	0.307312	0.00884505	3508.4	36.6	3506.8	44.4	3507.7	28.2
ples - 1.d	752.689	11.0387	107.251	1.59557	0.142491	18.165	0.247821	0.0527285	0.00235925	345.46	4.58	316.2	101.8	345.39	4.58
ples - 2.d	117.654	2.57908	178.66	3.9961	1.51852	18.3467	0.239597	0.0538787	0.00230015	342.12	4.36	365	96.2	342.17	4.34
ples - 3.d	113.453	1.93937	149.401	3.00047	1.31685	18.0605	0.206247	0.0515393	0.00178473	347.4	3.86	264	79.2	347.14	3.86
ples - 4.d	106.334	0.903741	150.785	2.03941	1.41803	18.1707	0.204358	0.0534002	0.00201849	345.35	3.78	344.8	85.6	345.35	3.78
ples - 5.d	100.554	1.93736	92.4411	1.68368	0.919318	18.021	0.218793	0.0543038	0.00186043	348.14	4.12	382.5	77	348.23	4.12
ples - 6.d	116.657	1.56529	115.085	1.32145	0.986523	18.1258	0.220236	0.0533811	0.00188912	346.18	4.1	344	80.2	346.18	4.08
ples - 7.d	127.994	2.46036	139.693	1.59353	1.0914	18.474	0.308856	0.0532079	0.00312661	339.83	5.54	336.7	133.2	339.82	5.52
ples - 8.d	168.443	3.50996	239.441	3.55046	1.4215	18.6456	0.325139	0.0518209	0.00310553	336.78	5.72	276.4	137.4	336.65	5.72
ples - 9.d	172.39	3.99681	289.333	6.80316	1.67837	18.3688	0.282892	0.0530481	0.0032338	341.72	5.12	329.9	138.2	341.71	5.12
ples - 10.d	86.5704	1.53879	77.7882	1.2245	0.898554	18.405	0.260603	0.0540795	0.00272968	341.07	4.7	373.4	113.6	341.12	4.7
ples - 11.d	109.109	1.72749	102.692	1.95784	0.941181	18.3725	0.260408	0.0524126	0.00279493	341.66	4.72	302.3	121.4	341.59	4.72
ples - 12.d	118.091	1.14786	95.1547	0.777369	0.805776	18.2233	0.288809	0.054838	0.00330159	344.38	5.32	404.7	134.8	344.45	5.32
ples - 13.d	74.8272	1.06093	67.4423	0.826936	0.901308	18.1572	0.212719	0.0543378	0.0017963	345.6	3.94	384.2	74.4	345.69	3.94
ples - 14.d	138.851	1.95955	190.625	3.0656	1.37288	18.3851	0.195144	0.0553588	0.00195684	341.43	3.52	425.8	79	341.54	3.52
ples - 15.d	139.49	1.82127	192.116	2.89699	1.37728	18.1458	0.21341	0.0526793	0.00178206	345.81	3.96	314	76.8	345.72	3.96
ples - 16.d	106.241	1.92487	153.044	3.19419	1.44054	18.2945	0.227918	0.0685185	0.00253476	343.08	4.16	883.4	76.4	342.18	4.18
ples - 17.d	136.894	2.43727	166.734	2.83197	1.21798	18.1402	0.246136	0.0540827	0.00209364	345.92	4.56	373.4	87	345.99	4.56
ples - 18.d	88.4398	1.58759	133.337	2.14649	1.50766	18.4311	0.249014	0.0536692	0.00221961	340.6	4.48	356.2	93.4	340.63	4.48
Session2
ogc - 1.d	755.36	13.0604	189.511	4.10557	0.250888	1.39434	0.0111671	0.30216	0.00361239	3485.5	21.6	3480.64	18.5	3482.69	14.02
ogc - 2.d	681.879	13.7936	118.158	2.34995	0.173283	1.41975	0.0113934	0.298748	0.00378158	3437.1	21.4	3463.06	19.6	3451.14	14.56
ogc - 3.d	674.637	16.4038	161.278	3.61944	0.239059	1.39895	0.0107848	0.299084	0.00339041	3476.6	20.8	3464.77	17.56	3469.71	13.36
ogc - 4.d	716.891	17.3752	172.606	4.31817	0.24077	1.39167	0.0112594	0.29972	0.00381907	3490.7	21.8	3468.08	19.74	3478.2	14.54
ogc - 5.d	709.196	15.9594	169.409	3.93163	0.238875	1.39646	0.00964356	0.294508	0.00351559	3481.4	18.56	3440.89	18.56	3460.94	12.96
ogc - 6.d	607.729	14.1647	101.261	2.29499	0.166622	1.35938	0.0130269	0.298467	0.00401947	3554.4	26.2	3461.6	20.8	3497.15	15.98
ogc - 7.d	542.04	13.9499	84.1506	2.10353	0.155248	1.39288	0.00972863	0.298732	0.00346761	3488.31	18.82	3462.95	18	3475	12.92
ogc - 8.d	640.025	15.5875	108.884	2.57888	0.170124	1.36997	0.0108104	0.29898	0.00325842	3533.2	21.4	3464.25	16.9	3490.37	13.08
ogc - 9.d	630.218	13.7953	108.88	2.45482	0.172766	1.38881	0.0115402	0.2989	0.00373059	3496.2	22.4	3463.84	19.34	3477.56	14.52
ogc - 10.d	625.02	13.664	108.842	2.41568	0.174142	1.41206	0.0101133	0.297666	0.00313642	3451.61	19.14	3457.44	16.36	3454.98	12.46
ogc - 11.d	106.996	2.72428	174.606	4.63096	1.6319	1.38535	0.0104531	0.297477	0.00343936	3502.9	20.4	3456.45	17.94	3476.55	13.3
ogc - 12.d	148.169	7.64048	268.282	17.5283	1.81065	1.38204	0.011259	0.299937	0.003663	3509.4	22	3469.22	18.9	3486.12	14.2
ogc - 13.d	153.174	4.73111	251.913	7.28597	1.64462	1.40115	0.0118044	0.300079	0.00354024	3472.4	22.6	3469.94	18.28	3470.91	14.2
ogc - 14.d	122.222	2.91901	200.807	4.34515	1.64298	1.38735	0.01159	0.304566	0.00427801	3499	22.6	3492.9	21.8	3495.86	15.62
ogc - 15.d	107.098	3.00926	90.121	2.35688	0.841481	1.4324	0.0169233	0.302857	0.00386548	3413.6	31.4	3484.22	19.78	3464.02	16.88
ogc - 16.d	67.78	2.60205	97.861	3.96081	1.4438	1.36861	0.011709	0.303806	0.00394627	3535.9	23.2	3489.1	20.2	3508.9	15.04
ogc - 17.d	164.324	3.86259	289.635	5.20838	1.76258	1.37119	0.0132874	0.301566	0.00400238	3530.8	26.4	3477.6	20.6	3497.55	16
ogc - 18.d	184.399	4.32261	221.287	5.43866	1.20005	1.38725	0.0108859	0.300696	0.00439089	3499.2	21.2	3473.1	22.6	3486.94	15.34
ples - 1.d	121.422	3.38973	115.569	4.74299	0.9518	18.2459	0.185735	0.0594815	0.0014777	343.97	3.4	583.7	54	344.14	3.42
ples - 2.d	198.441	2.77995	392.571	12.4527	1.97828	18.5743	0.161721	0.0537263	0.00138375	338.04	2.86	358.7	58	338.09	2.86
ples - 3.d	193.738	4.77646	373.593	8.57093	1.92834	18.5288	0.153131	0.0531485	0.00143439	338.85	2.72	334.2	61	338.84	2.72
ples - 4.d	146.289	3.40705	234.913	5.33338	1.60581	18.4315	0.179938	0.0521508	0.00126397	340.59	3.24	291	55.2	340.39	3.22
ples - 5.d	133.928	3.598	110.055	2.85911	0.821746	18.5115	0.169965	0.0524099	0.00141278	339.16	3.04	302.3	61.4	339.06	3.02
ples - 6.d	117.63	1.6895	160.693	4.96464	1.36609	18.416	0.15186	0.0519703	0.00143658	340.87	2.74	283.1	63.4	340.74	2.74
ples - 7.d	101.766	1.88276	164.931	3.53958	1.6207	18.3631	0.160515	0.0526435	0.00143449	341.83	2.92	312.3	61.8	341.75	2.9
ples - 8.d	95.5922	2.31111	151.716	3.54826	1.58712	18.5455	0.154294	0.0529933	0.00140119	338.55	2.74	327.3	60	338.53	2.74
ples - 14.d	86.7269	2.24525	138.672	3.61317	1.59895	18.4839	0.156439	0.0542412	0.0016169	339.65	2.8	380	67.2	339.71	2.8
ples - 15.d	92.5025	1.43027	86.2414	1.7057	0.932314	18.6009	0.160272	0.0551401	0.00153503	337.57	2.84	416.9	62.4	337.68	2.84
Session3
ogc - 1.d	526.75	9.48602	78.4919	1.20945	0.149012	1.41626	0.012171	0.305927	0.00576851	3443.7	23	3499.8	29.2	3464.6	18.36
ogc - 2.d	532.081	13.7577	76.7998	2.06242	0.144339	1.37599	0.0112101	0.301962	0.005148	3521.3	22.2	3479.6	26.4	3503.85	16.72
ogc - 3.d	556.528	11.9591	81.838	1.79945	0.147051	1.36934	0.0124162	0.302746	0.00597053	3534.5	24.6	3483.7	30.6	3513.96	18.88
ogc - 4.d	556.412	12.6683	81.2668	1.81039	0.146055	1.40731	0.0111284	0.300077	0.00553474	3460.6	21.2	3469.9	28.6	3463.92	17.06
ogc - 5.d	571.341	13.6158	85.0297	1.95035	0.148825	1.39653	0.0112171	0.303258	0.00557952	3481.3	21.6	3486.3	28.4	3483.09	17.24
ogc - 6.d	650.279	15.0917	103.536	2.60788	0.159217	1.41149	0.0112872	0.300458	0.00551394	3452.7	21.4	3471.9	28.4	3459.58	17.18
ogc - 7.d	644.403	12.1326	103.1	1.67466	0.159993	1.4133	0.0107176	0.3029	0.00580955	3449.3	20.2	3484.4	29.6	3460.22	16.92
ogc - 8.d	776.782	16.6554	176.402	3.7928	0.227094	1.38107	0.012974	0.301162	0.0061459	3511.3	25.4	3475.5	31.6	3497.04	19.6
ogc - 9.d	746.869	18.7845	173.221	4.08363	0.23193	1.41904	0.0104036	0.303648	0.00517349	3438.45	19.54	3488.2	26.4	3455.68	15.94
ogc - 10.d	526.884	12.1319	87.5142	2.00375	0.166098	1.38772	0.012775	0.301079	0.00642681	3498.3	24.8	3475.1	33	3489.84	19.72
ogc - 11.d	522.862	11.7176	89.741	2.02322	0.171634	1.38925	0.0108999	0.293411	0.00508136	3495.3	21.2	3435.1	26.8	3471.7	16.32
ogc - 12.d	535.418	12.9474	95.6539	2.26051	0.178653	1.38909	0.010968	0.294768	0.00561276	3495.7	21.4	3442.3	29.6	3476.89	17
ogc - 13.d	547.257	13.185	101.781	2.35936	0.185984	1.44809	0.0138886	0.294106	0.0058411	3384.8	25.2	3438.8	30.8	3405.99	19.88
ogc - 14.d	527.831	11.5676	89.8633	1.88175	0.17025	1.6353	0.0136373	0.298039	0.00603589	3076	20.4	3459.4	31.4	3159.53	19.34
ogc - 15.d	115.641	3.27571	191.816	5.95332	1.65871	1.365	0.0124499	0.301029	0.00622532	3543.1	24.8	3474.8	32	3516.7	19.22
ogc - 16.d	193.963	5.46396	364.892	9.85279	1.88124	1.40816	0.0127508	0.304502	0.006025	3459	24.2	3492.6	30.6	3471.75	19.22
ogc - 17.d	74.9951	1.9696	92.2871	2.33334	1.23057	1.42464	0.0124347	0.299528	0.00552026	3428	23.2	3467.1	28.6	3443.28	18.24
ogc - 18.d	130.432	4.3299	206.559	7.22673	1.58365	1.39567	0.0112576	0.296366	0.00612995	3482.9	21.8	3450.7	32	3472.6	17.8
ples - 1.d	158.568	4.34693	158.884	5.51881	1.002	18.3827	0.14692	0.0543272	0.00196335	341.47	2.66	383.7	81	341.51	2.66
ples - 2.d	190.531	7.98463	304.248	12.2478	1.59684	18.5407	0.170117	0.053952	0.00190687	338.64	3.02	367.9	79.8	338.67	3.02
ples - 3.d	147.145	1.81476	215.915	1.41133	1.46736	18.5796	0.172165	0.0525784	0.0017565	337.95	3.06	309.7	76.2	337.9	3.04
ples - 4.d	91.6965	1.97833	127.098	2.13895	1.38607	18.4896	0.160714	0.0533189	0.00191053	339.55	2.88	341.4	81	339.55	2.88
ples - 5.d	208.027	5.8737	332.885	8.48973	1.6002	18.5062	0.164627	0.0537191	0.00212563	339.25	2.94	358.3	89.4	339.27	2.94
ples - 6.d	87.4594	2.4034	79.4672	2.12155	0.908617	18.8163	0.16489	0.0538126	0.00193912	333.8	2.86	362.1	81.4	333.83	2.84
ples - 7.d	126.751	3.69113	113.823	3.46741	0.898003	18.6107	0.158436	0.0541802	0.00190266	337.4	2.8	377.5	78.8	337.44	2.8
ples - 8.d	116.565	2.7662	116.018	2.61972	0.995301	18.5321	0.144727	0.054602	0.00163519	338.79	2.58	394.9	67.4	338.86	2.58
ples - 9.d	114.293	4.55991	182.251	7.30894	1.59459	18.584	0.159581	0.0536992	0.00167917	337.87	2.82	357.5	70.6	337.9	2.82
ples - 14.d	119.149	4.90854	186.016	7.67057	1.56121	18.4466	0.162288	0.0521375	0.00196954	340.32	2.92	290.5	86.4	340.25	2.92
ples - 15.d	97.523	4.39048	150.489	7.50235	1.54311	18.4666	0.182252	0.0551213	0.00212758	339.96	3.26	416.1	86.4	340.04	3.26
ples - 16.d	74.3253	1.22521	68.4917	1.08428	0.921513	18.5474	0.185947	0.0522179	0.00181294	338.52	3.3	294	79.2	338.43	3.3
ples - 17.d	142.216	4.8896	168.505	6.30729	1.18486	18.6033	0.158546	0.0529211	0.00184538	337.53	2.8	324.3	79.4	337.51	2.8
ples - 18.d	93.3978	1.97614	127.923	2.28002	1.36966	18.5659	0.183301	0.0531402	0.00192668	338.19	3.26	333.8	82.4	338.18	3.26
